# Supplementary material
Source: Springer Nature journal article supplement (https://www.springermedizin.de/resource/supplementary/12879_2013_3137_MOESM2_ESM.pdf/9446064)

**A****Comorbid conditions**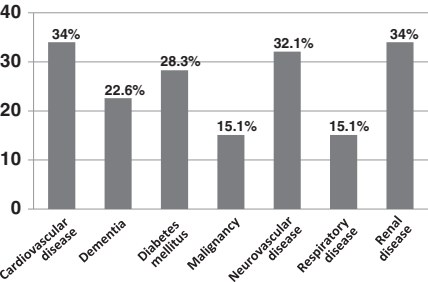**B****McCabe classification for comorbidity**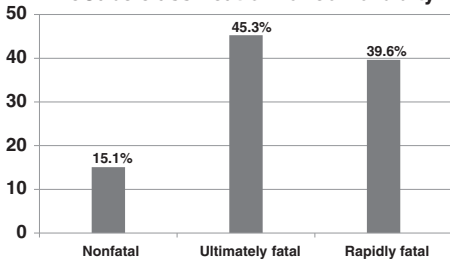

Supplement: MOESM2 [file 9446064]
